# Supplementary material for: Caspar Controls Resistance to Plasmodium falciparum in Diverse Anopheline Species
Source: PubMed Central journal article supplement (PMC2647737; doi:10.1371/journal.ppat.1000335), 2009-03-13
Supplement: ppat.1000335.s003.pdf [file ppat.1000335.s003.pdf]

Table S1: Gene expression in *cactus*-, *caspar*-, *cactus/re11*- and *caspar/re12*-silenced mosquitoes

A. Comparisons of array-derived and real time PCR-derived gene expression values in *cactus*-silenced mosquitoes and real time PCR-derived gene expression values in *cactus/re11* double silenced mosquitoes.

| <b>Gene</b> | <i>Array ratio</i> | <i>Single KD ratio</i> | <i>Double KD ratio</i> |
|-------------|--------------------|------------------------|------------------------|
| Tep1        | 2.66               | 2.51                   | <b>0.70</b>            |
| Cec1        | 2.75               | 2.23                   | <b>0.60</b>            |
| CLIPA9      | 2.75               | 1.85                   | 0.92                   |
| Tep3        | 3.01               | 3.25                   | 1.43                   |
| Def1        | 2.99               | 4.23                   | 0.54                   |
| ClipD3      | 0.60               | 0.14                   | 0.23                   |
| CathD       | 2.79               | 3.14                   | 0.28                   |
| 7024        | 0.24               | 0.37                   | 3.06                   |
| Fz2         | 2.73               | 2.43                   | 1.12                   |
| 2325        | 0.67               | 0.89                   | 0.37                   |
| 7709        | 0.27               | 0.09                   | 0.59                   |
| LRRD7       | 2.66               | 2.87                   | 0.02                   |
| Gam         | 1.39               | 1.71                   | 0.03                   |
| Fbn37       | 2.62               | 6.28                   | 0.29                   |
| 5159        | 0.67               | 1.27                   | 0.05                   |
| Fbn9        | 1.01               | 1.01                   | 2.04                   |
| cec3        | 3.01               | 1.91                   | 0.84                   |
| Irim1       | 0.96               | 1.18                   |                        |
| 202         | 0.65               | 1.04                   | 1.27                   |

B. Comparisons of array-derived and real time PCR-derived gene expression values in *caspar*-silenced mosquitoes and real time PCR-derived gene expression values in *caspar/re12* double silenced mosquitoes.

| <b>Gene</b> | <i>Array ratio</i> | <i>Single KD ratio</i> | <i>Double KD ratio</i> |
|-------------|--------------------|------------------------|------------------------|
| Tep1        | 1.42               | 2.02                   | <b>1.63</b>            |
| Cec1        | 2.28               | 2.50                   | <b>0.90</b>            |
| CLIPA9      | 2.13               | 2.27                   | 0.39                   |

|         |      |      |      |
|---------|------|------|------|
| Tep3    | 1.74 | 4.82 | 1.98 |
| Def1    | 2.25 | 3.03 | 0.45 |
| ClipD3  | 0.65 | 0.87 | 0.07 |
| CathD   | 0.65 | 0.85 | 0.13 |
| 7024    | 0.80 | 0.55 | 0.39 |
| Fz2     | 1.85 | 3.56 | 0.49 |
| 2325    | 0.47 | 0.75 | 0.94 |
| 7709    | 1.24 | 1.07 | 2.82 |
| LRRD7   | 0.50 | 0.40 | 0.69 |
| Gam     | 1.26 | 2.00 | 0.38 |
| Fbn37   | 1.92 | 3.43 | 0.31 |
| 5159    | 1.05 | 1.01 | 1.20 |
| Fbn9    | 0.50 | 0.23 | 3.15 |
| Cec3    | 2.89 | 2.17 | 0.35 |
| Irim1   | 1.19 | 1.07 |      |
| 202     | 0.54 | 0.59 | 1.03 |
| PGRP-LC | 0.87 | 0.97 |      |
