# Supplementary material for: Caspar Controls Resistance to Plasmodium falciparum in Diverse Anopheline Species
Source: PubMed Central journal article supplement (PMC2647737; doi:10.1371/journal.ppat.1000335), 2009-03-13
Supplement: ppat.1000335.s004.pdf [file ppat.1000335.s004.pdf]

Table S2: Immune genes regulated by negative regulator silencing

A: Immune genes regulated by *cactus* silencing (microarray data)

| Gene                                     | Transcript ID      | Gene Mean (log transformed) |
|------------------------------------------|--------------------|-----------------------------|
| TEP15                                    | ENSANGT00000019522 | -1.19499                    |
| PPO1                                     | ENSANGT00000016955 | -0.87914                    |
| CLIPD3                                   | ENSANGT00000015747 | -0.73088                    |
| SCRASP1                                  | ENSANGT00000021796 | 0.913118                    |
| LYSC7                                    | ENSANGT00000018439 | 0.975108                    |
| IKK2                                     | ENSANGT00000014138 | 1.044782                    |
| cysteine<br>protease                     | ENSANGT00000013730 | 1.093077                    |
| SRPN5                                    | ENSANGT00000010507 | 1.178443                    |
| SCRB5                                    | ENSANGT00000010275 | 1.19922                     |
| Peroxidase                               | ENSANGT00000010957 | 1.227552                    |
| Serine protease                          | ENSANGT00000027174 | 1.243046                    |
| Hemolymph<br>glycoprotein<br>precursor 2 | ENSANGT00000021546 | 1.262992                    |
| Bax Inhibitor-like                       | ENSANGT00000018745 | 1.336844                    |
| Serine protease                          | ENSANGT00000013945 | 1.371173                    |
| Thioredoxin<br>peroxidase                | ENSANGT00000019782 | 1.395342                    |
| CLIPA9                                   | ENSANGT00000012706 | 1.415413                    |
| Cecropin 1                               | ENSANGT00000011957 | 1.455392                    |
| CathepsinD                               | ENSANGT00000013568 | 1.475551                    |
| Programmed<br>Cell Death 4               | ENSANGT00000022035 | 1.48032                     |
| Serine protease                          | ENSANGT00000013929 | 1.486222                    |
| Defensin 1                               | ENSANGT00000015621 | 1.583707                    |
| Cecropin 3                               | ENSANGT00000011995 | 1.588534                    |
| TEP3                                     | ENSANGT00000016283 | 1.59017                     |
| CLIPB17                                  | ENSANGT00000022148 | 1.626139                    |
| CLIPD4                                   | ENSANGT00000016188 | 1.750059                    |
| DSCAM10.27                               | DSCAM exon 10.27   | -1.05664                    |
| FBN                                      | ENSANGT00000011478 | -1.10248                    |

|                     |                    |          |
|---------------------|--------------------|----------|
| FBN                 | ENSANGT00000026109 | -0.75895 |
| FBN                 | ENSANGT00000022610 | 1.13194  |
| FBN37               | ENSANGT00000014402 | 1.390773 |
| LRR                 | ENSANGT00000028101 | -1.15935 |
| LRRD7 (aka<br>APL2) | ENSANGT00000021822 | 1.410297 |

B. Immune genes regulated by *caspar* silencing (microarray data)

| <b>Gene</b>         | <b>Transcript ID</b> | <b>Gene Mean (log transformed)</b> |
|---------------------|----------------------|------------------------------------|
| Serine protease     | ENSANGT00000010335   | -0.97068                           |
| T028113             | ENSANGT00000028113   | -0.89195                           |
| TEP3                | ENSANGT00000016283   | 0.80036                            |
| CLIPB4              | ENSANGT00000023726   | 0.831363                           |
| CLIPD4              | ENSANGT00000016188   | 0.87801                            |
| SCRB1               | ENSANGT00000015893   | 0.92863                            |
| CLIPA9              | ENSANGT00000012706   | 1.08824                            |
| AgMDL8              | ENSANGT00000016928   | 1.136152                           |
| Defensin 1          | ENSANGT00000015621   | 1.170995                           |
| Cecropin 1          | ENSANGT00000011957   | 1.188302                           |
| Cecropin 3          | ENSANGT00000011995   | 1.52728                            |
| Serine protease     | ENSANGT00000013929   | 1.604603                           |
| DSCAM10.21          | DSCAM exon 10.21     | 0.948289                           |
| FBN9                | ENSANGT00000011248   | -0.99312                           |
| FBN37               | ENSANGT00000014402   | 0.943292                           |
| FBN                 | ENSANGT00000022867   | 0.972901                           |
| LRRD7 (aka<br>APL2) | ENSANGT00000021822   | -0.99117                           |
